# Supplementary material for: Evaluation of blood pressure and NT-proBNP in pugs with and without clinical signs of Brachycephalic Obstructive Airway Syndrome
Source: Front Vet Sci. 2022 Dec 22;9:1015157. doi: 10.3389/fvets.2022.1015157 (PMC9815440; doi:10.3389/fvets.2022.1015157)
Supplement: Supplementary file 2 [file Table_2.XLSX]

## Sheet: Table 1
Blood values
Dogs	Age (months)	Body weight (kilogramm)	Parameter	WBC	RBC	HGB	HCT	MCV	MCH	MCHC	PLT	MPV	ALT	GLDH	ALP	BiliT	GLUC	TP	ALB
			Reference range	6 - 12	6 - 9	15 - 19	40 - 55	60 - 77	17 - 23	31 -34	150 - 500	8.4 - 15.2	0 - 50	0 - 6	0 - 150	0 - 0.2	70 - 110	6 - 7.6	3 - 4.5
1	61	8		8.53	6.37	15	44	69.1	23.6	34.1	443	9	11	0.8	12	0	107	6.55	3.97
2	27	8		13.96	6.21	15.1	43.7	70.4	24.3	34.5	460	9.3	12	1.7	13	0	98	6.14	3.46
3	75	9		8.13	6.47	15.2	44.6	69	23.5	34.1	466	11	17	0.9	9	0	104	6.54	3.83
4	42	8.8		9.5	5.82	14.2	41.9	71.9	24.3	33.8	547	12	15	3	19	0	95	6.67	3.33
5	29	8.6		11.2	6.69	15.1	44.7	66.8	22.5	33.7	431	15.1	19	1.8	28	0	103	6.02	3.61
6	44	8.6		11.87	5.36	12.5	37	69.1	23.4	33.9	503	13.5	16	2.3	46	0	100	6.31	3.46
7	25	6		10.49	6.9	16.8	46.8	67.8	24.4	36	230	8.6	12	1.4	10	0	100	6.38	3.81
8	115	7.8		7.26	6.02	14.8	41	68.1	24.5	36	397	14.1	12	1.8	11	0	91	6.51	3.2
9	30	10.6		8.81	5.46	13.9	39.5	72.4	25.5	35.1	394	12	15	1.7	23	0	98	6.21	3.92
10	76	7.7		7.6	5.62	13	37.8	67.3	23.2	34.4	676	13.3	9	1.5	12	0	102	6.16	3.26
11	68	8.3		13.7	6.89	15	43.3	62.8	21.7	34.6	424	12.4	68	8.6	40	0.12	95	5.7	3.32
12	32	8.2		10.68	6.97	15.6	45.3	64.9	22.4	34.5	515	11.5	12	1.6	12	0	107	5.9	3.65
13	62	7.2		7.44	5.93	14	41	69.2	23.7	34.2	602	10.1	14	2.4	9	0	99	6.15	3.65
14	32	6.3		11.33	6.02	14.9	43	71.4	24.7	34.5	451	9.1	19	2.5	23	0.06	107	6.31	3.54
15	32	7.5		10.96	6.82	14.4	43.4	63.7	21.1	33.1	314	11.2	18	2.5	34	0.09	94	6.09	2.92
16	64	9.6		10.97	6.28	15.6	45.4	72.3	24.8	34.3	497	9	12	1.6	17	0	110	5.6	3.3
17	43	8.2		9.11	6.42	14.8	43.2	67.3	23.1	34.3	364	9.6	14	0.9	20	0	94	5.84	3.54
18	45	6.6		10.03	6.48	15	44.9	69.3	23.2	33.5	526	9.7	17	0	35	0	89	6.84	4.07
19	89	9.2		11.29	5.99	15	42.9	71.6	25.1	35.1	583	9.3	28	2.3	20	0	106	6.11	3.77
20	52	9.6		8.42	6.63	15.5	44.9	67.7	23.4	34.5	524	10.6	17	1.9	16	0.11	108	6.54	3.82
21	43	9.2		12.98	6.94	16.2	47.2	68	23.3	34.2	418	12	27	2.2	34	0.11	119	6.75	3.32
22	77	11.4		8.83	7.97	18.4	54.5	68.4	23.1	33.8	283	8.9	20	0	14	0.13	89	6.44	3.82
23	43	9		9.87	6.76	15.9	45.9	67.9	23.6	34.8	461	9.6	12	0.9	29	0.11	94	6.25	3.85
24	61	10.4		8.44	7	16.4	47.9	68.4	23.4	34.2	437	10.4	14	1.1	16	0	116	6.73	3.36
25	58	10		7.57	7.39	17	50.3	68.1	23	33.8	382	10.1	21	1.6	19	0	111	6.49	4
26	25	11.6		9.32	7.6	17.7	51.1	67.3	23.3	34.6	240	12	17	1.3	17	0.17	105	6.31	3.98
27	30	9.4		12.42	5.14	12.8	37	72	25	34.7	481	14.7	15	0	13	0.11	93	6.43	4.04
28	55	10.6		9.7	6.17	14.3	41.6	67.3	23.1	34.3	501	10.1	17	1.4	13	0.04	96	6.73	3.57
29	24	9		9.55	5.9	13.7	41.7	70.6	23.3	32.9	579	12.3	24	2.8	26	0.1	117	5.49	3.57
30	29	9		9.11	5.77	13.8	39.9	69.2	23.9	34.5	509	12.1	11	1	14	0.01	106	5.82	3.73
31	100	8.8		7.94	6.49	15.5	45.8	70.5	23.9	33.8	374	10.4	14	0	15	0.12	100	6.18	3.59
32	78	8.8		15.4	5.95	13.8	41.4	69.6	23.1	33.2	717	12.8	17	2.5	44	0	109	6.54	3.48
33	24	8.4		11.62	6.46	15.3	44.2	68.5	23.6	34.5	524	9.3	13	1.5	14	0	110	6.2	3.77
34	62	7.6		6.79	6.11	14.7	42.5	69.5	24	34.6	481	10.3	15	1.7	22	0	108	6.33	4.01
35	31	8.6		8.61	6.51	14.9	44.9	68.9	22.9	33.3	423	9.1	13	1.7	29	0	105	5.94	3.42
36	65	8.5		6.64	5.8	13.3	39.4	68	23	33.8	457	9.2	16	0.7	11	0	89	6.63	3.69
37	55	12.4		13.46	6.31	14.9	43.5	69	23.7	34.3	395	12.2	21	2	9	0	101	6.24	4.22
38	35	9.9		14.1	5.81	13.7	41.4	71.2	23.6	33.1	411	10.5	24	1.8	17	0	101	6.4	3.54
39	42	10.1		12.15	5.8	14.1	41.3	71.3	24.3	34.1	462	10.9	29	2.5	11	0	107	6.35	3.67
40	123	8.3		6.71	6.81	16.7	49	71.9	24.5	34.1	345	12.6	17	2.1	21	0.12	104	6.35	3.52
41	27	8.7		8.16	6.45	14.1	43	66.7	21.9	32.8	356	12.3	36	11.6	18	0	101	6.34	3.55
42	61	9.8		7.29	5.72	13.8	41.2	72	24.2	33.6	324	12.4	16	1.9	23	0.11	95	6.7	3.77
43	64	11.7		11.39	6.29	14.2	42	66.8	22.6	33.8	336	13.7	25	0	13	0	110	7.35	3.95
44	25	10		11.13	6.53	16.1	47.6	72.9	24.7	33.9	411	12.2	22	2.7	21	0	103	6.32	3.57
45	105	6.5		7.67	6.75	15.5	47.1	69.9	23	33	515	9.4	12	0	19	0.07	72	5.77	3.24
46	83	10.8		6.44	6.68	15.6	45.4	67.9	23.3	34.3	199	13.4	17	1.4	59	0.17	93	5.8	3.79
47	42	6.1		7.46	7.35	17.6	52	70.8	23.9	33.8	336	10.7	13	0	63	0.15	98	6.08	3.75
48	111	7.6		6.82	6.57	15.1	43.3	65.9	22.9	34.8	470	12.2	15	0	17	0	82	6.86	3.47
49	125	9.4		6.95	6.56	16.2	46.7	71.1	24.7	34.7	268	10.5	21	0	29	0	90	6.21	3.82
50	39	10.7		5.99	6.74	15.7	45.1	66.9	23.2	34.7	217	9.3	14	0	12	0.12	95	5.92	3.56
51	60	11		9.79	6.31	15.1	43.8	69.5	23.9	34.4	233	13.2	24	2	14	0.1	95	6.12	3.48
52	49	9.3		13.93	7.82	17.7	51.1	65.3	22.6	34.6	472	10	23	0	34	0	94	7.16	3.98
53	47	10		12.5	6.67	15.2	45	67.4	22.8	33.9	382	12.8	12	3.1	43	0.05	101	6.75	3.71
54	88	6.6		7.72	7.27	17.8	51.2	70.5	24.5	34.7	202	11.2	22	2.3	17	0.13	108	5.87	3.74

## Sheet: Legend
WBC: white blood cells
RBC: red blood cells
HGB: haemoglobin
HCT: hematocrit
MCV: mean corpuscular cell volume
MCH: mean corpuscular hemoglobin
MCHC: mean corpuscular hemoglobin concentration
PLT: platelets
MPV: mean platelets volume
ALT: alanine aminotransferase
GLDH: glutamat dehydrogenase
ALP: alkaline phosphatase
BiliT: total bilirubin
GLUC: glucose
TP: total protein
ALB: albumin
