# Supplementary figures and images for: Evaluation of blood pressure and NT-proBNP in pugs with and without clinical signs of Brachycephalic Obstructive Airway Syndrome
Source: Frontiers journal article supplement (doi:10.3389/fvets.2022.1015157), 2022-12-22

Supplementary Material Figure 1


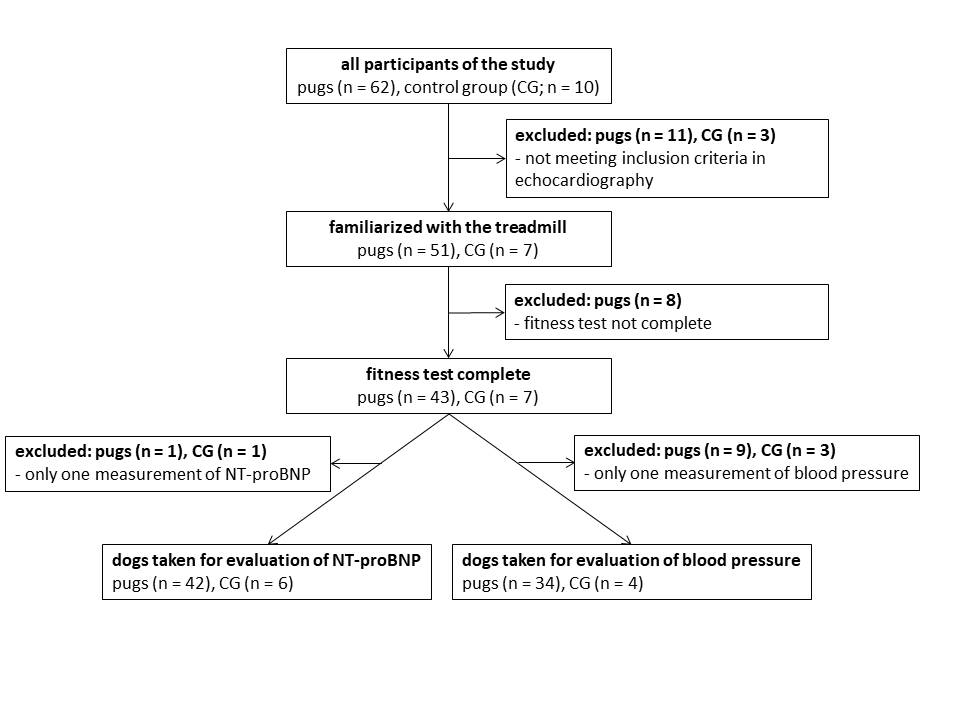


Figure 1: Overview of exclusion.

Supplement: Data_Sheet_1.zip [file Supplementary Figure 1.docx]
